# Supplementary material for: Overexpression of the tonoplast sugar transporter CmTST2 in melon fruit increases sugar accumulation
Source: PubMed Central journal article supplement (PMC5853577; doi:10.1093/jxb/erx440), 2017-12-23
Supplement: erx440_suppl_supplementary_figures_s1-s5_and_table_s1-s2.pdf [file erx440_suppl_supplementary_figures_s1-s5_and_table_s1-s2.pdf]

|          |                                                                                                                                                |     |
|----------|------------------------------------------------------------------------------------------------------------------------------------------------|-----|
| AtTST2   | MSGAVLVAAARVGNLIGWDNATIAGAVLYIKKEFNLESNPVEGLIVATSLIGATLITTCSCGVADNLGRRPMLLSSILYFVGSVLWSPNVYVLL                                                 | 100 |
| BvTST2.1 | MSAAVLVAHAATVGDLLYGDWNTIAGAVLYIKKEFNLESSPTEGLIVATSLIGATLITTCSCPTADRLGRRPMMIISVCFVSAIHLWSPNVYVLL                                                | 100 |
| CmTST2   | MSGSVLVAAARVGNLIGWDNATIAGAVLYIKKEFNLESSPVEGLIVATSLIGATLITTCSCAISDNLGRRLLLFSSVLYFVGGIIMLWSPNVYVLL                                               | 100 |
|          | <div style="display: flex; justify-content: space-around; width: 100%;"> <span>1</span> <span>2</span> <span>3</span> </div>                   |     |
| AtTST2   | IGRLLDGFVGLVITLVEFYISETAPPEIRGLNLTLPQFTGSGMFLSYCMVFGMSLMFSPSWRLMLGLVLFHPSLVFFFLTVFFLPESPRWLVSKGRMLE                                            | 200 |
| BvTST2.1 | IGRLLDGFVGLVITLVEFYISETAPTDIRGSLNLTLPQFTGSGMFLHAYCMVFGMSLMETPSWRLMLGLVLFVPSLVVYVLLTVFFLPESPRWLVSKGRMNE                                         | 200 |
| CmTST2   | IGRLLDGFVGLVITLVEFYISETAPPEIRGSLNLTLPQFTGSGMFFSYCMVFGMSLMFSPSWRLMLGLVLFHPSLIYLAITTVFFLPESPRWLVSKGRMLE                                          | 200 |
|          | <div style="display: flex; justify-content: space-around; width: 100%;"> <span>4</span> <span>5</span> <span>6</span> </div>                   |     |
| AtTST2   | AKRVLCRLRGREDVSGEMALLVEGLGIGGGTTTIEEYITCPADEVTDHDIADVTKDQIKLYGAEGLSWVARPVKGGSTMSVLSRGGSTMSRRQGSLLDPL                                           | 300 |
| BvTST2.1 | AKRVLCRLRGREDVFAEMALLVEGLRVGGTSTIEEYITCPADLAEDDPMYKDVRLYGSBAGCSWVARPVVGGSMGLIASRQGS.MQSPSVPLMDPL                                               | 299 |
| CmTST2   | AKRVLCRLRGREDVSGEMALLVEGLVGGGTSLEEFITCPADDLP.DODLLTKDDEIKLYGPEGLSWVARPVVGGSSIGLVSRRGGSIINQSG..LVDPL                                            | 297 |
| AtTST2   | VTLFGSVHEKLPEDTGSMSRALPFFFGSMFVSGGNQPRHEFDENLVGEGEDVPSLHGD...DSEDDLHSLPLISRQTTSMKDMPHTAHCTLSTFRHG                                              | 395 |
| BvTST2.1 | VTLFGSVHEKLPEDCGSMLSVIFPFFFGSMFVSGGKPKNEFDWDENTIGDDDDYGHDDDEYAGDAEDDNLRSLSISRQDTGPKRMVAPTSGSMFMSKHS                                            | 399 |
| CmTST2   | VTLFGSVHEKLPEDTGSMSRSLPFFFGSMFVSGGNQHRNEFDWDESLAREGEDYQSDGAG...NDSDDNLRSLSISRQTTSMKDMVAPAHCSLSSMRQG                                            | 393 |
| AtTST2   | SQVQGAQEGAGSGMIGGGWQAWKWREREDESQKEGGFKRYYLHQEGFFGSRRSIVSLPGDGTGEADFVQASALVSQPALYSKDLLKEHTIGPAMV                                                | 495 |
| BvTST2.1 | SWLQSE...ASGIGGGWQAWKWSERGLDQKEGGFKRYYLHQEGDAGSKRGSVLSLAGEVIGDNEYVRAALVSQPALYSRDFMDRDSIGPAMV                                                   | 494 |
| CmTST2   | SLAGEPVG...ASGIGGGWQAWKWREREPDGNKEGGFKRYYLHQEGTSGPQQGSIVSLPGDALTGGYIQAAALVSQPALYSKELMNQHPVGPAMV                                                | 489 |
| AtTST2   | HPSET.TKGSINHHDDHPGVKRALVGVGLQTLQQFSGINGVLYYTPQILECAGVGLLSNMGISGSSASLLISALTFVMLPATAVAMRLMDLSCRRTL                                              | 594 |
| BvTST2.1 | HPSEASAKRPSWRDFLEPGVRRALVGVGLQTLQQFSGINGVLYYTPQILECAGVGLLSHMGIGASSALLISALTTLLMLPATAVAMRLMDLSCRRTL                                              | 594 |
| CmTST2   | HPESI.TKGPSVDFDFPFGVKHALVGVGLQTLQQFSGINGVLYYTPQILEKAGVGLLSNLGIGSSASLLISGLTLLMLPSTAVAMRLMDLSCRRTL                                               | 588 |
|          | <div style="display: flex; justify-content: space-around; width: 100%;"> <span>7</span> <span>8</span> <span>9</span> </div>                   |     |
| AtTST2   | LLTFIPHLIASLLVLSNVLVMSNIVHAWLSTVSVVLYFCFFVMFGFPPNILCAEIFFPTRVRGICIAICALTFWICDIIVTYSLFVLLKSLGLAGVFG                                             | 694 |
| BvTST2.1 | LLTFIPVLELSLVVLIILANVIRKNTIYAVVSTVAVVLYFCFFVMFGFPPNILCAEIFFPTRVRGICIAICALTFWICDIIVTYLFPMMKAVGLAGVFG                                            | 694 |
| CmTST2   | LLTFIPALIASLIHLVIGSLVQMSIWNASISTVSVVLYFCFFVMFGFPPNILCAEIFFPTRVRGICIAICALTFWICDIIVTYLFLVLLNSIQLGGVFG                                            | 688 |
|          | <div style="display: flex; justify-content: space-around; width: 100%;"> <span>9</span> <span>10</span> <span>11</span> <span>12</span> </div> |     |
| AtTST2   | MYAVVCIISWVEVFLKVPETKGMPLVITTEFFSVGARKQAAAKNE                                                                                                  | 739 |
| BvTST2.1 | FYAVVILISWVEVFLKVPETKGMPLVITTEFFALGARQASH                                                                                                      | 735 |
| CmTST2   | MYAVVCIISWVEVFLKVPETKGMPLVITTEFFSVGARKLLAARKNG                                                                                                 | 733 |

**Supplementary Fig. S1.** Comparison of amino acid sequence of CmTST proteins and previously identified tonoplast localized sugar transporter AtTST2 (Arabidopsis) and BvTST2.1 (sugar beet). Black boxes indicate identical amino acid residues. Dark gray boxes represent amino acid residues with an identity of more than 50%. The 12 putative trans-membrane domains of CmTST2 are underlined. The sequence alignment was performed using the DNAMAN software package.

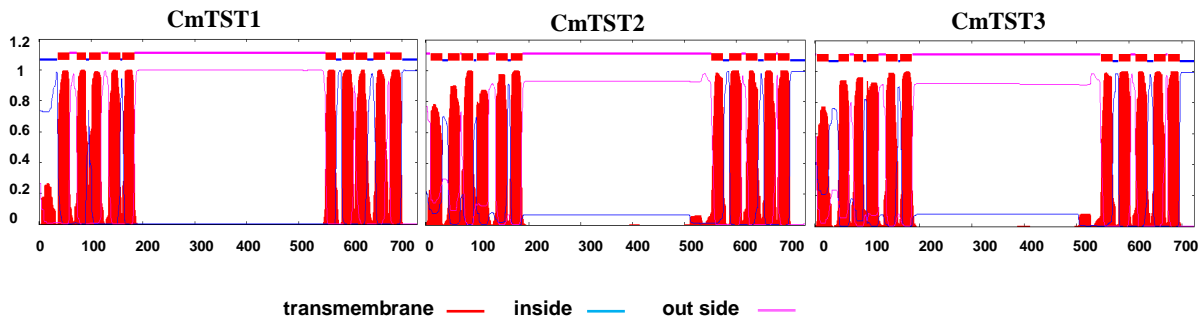

**Supplementary Fig. S2.** Membrane-spanning model of CmTSTs. The predicted website was TMHMM <http://genome.cbs.dtu.dk/services/TMHMM-2.0>.

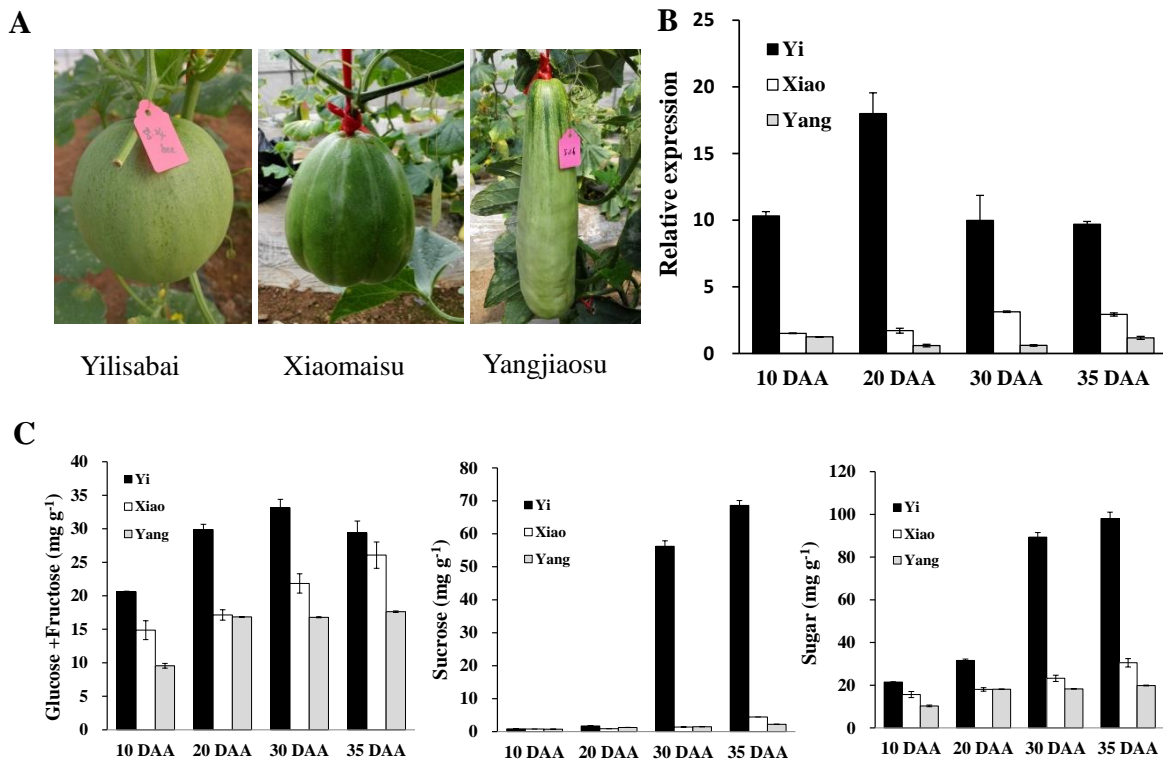

**Supplementary Fig. S3.** The expression of *CmTST2* in different melon genotypes with different sugar accumulation. (A) The fruit appearances of the three melon varieties, Yilisabai (Yi), Xiaomaisu (Xiao), and Yangjiaosu (Yang). (B) Relative expression of *CmTST2* in the melon varieties Yi, Xiao and Yang during different developmental stages were determined by qRT-PCR. *TUA* was used as reference gene. (C) Different types of sugar content in the three melon varieties' fruits during different developmental stages were determined by GC-MS. 'Sugar' means the total of glucose, fructose and sucrose. Error bars represent the SE for three technical replicates of three biological replicates.

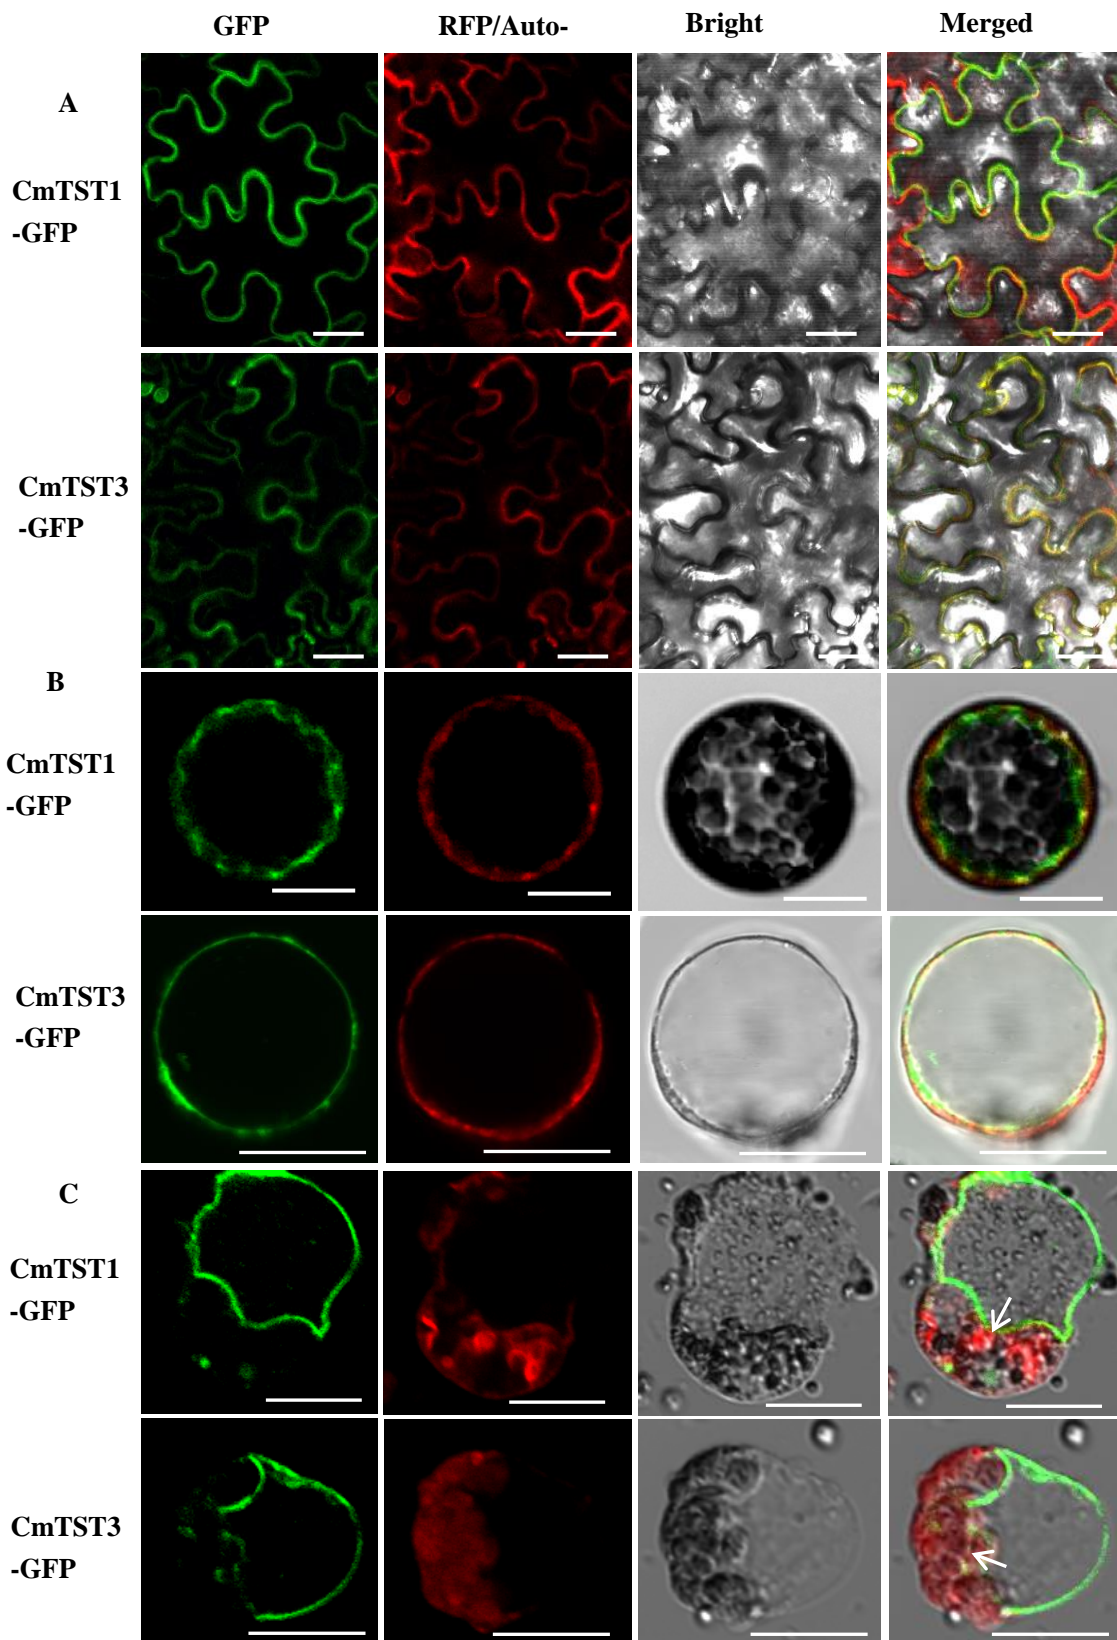

**Supplementary Fig. S4.** Subcellular localization of CmTST1/3-GFP fusion protein in tobacco. (A, B) Colocalization of CmTST1/3-GFP and AtRtip-RFP (tonoplast localization marker) in tobacco epidermal cell (A) or protoplast (B). (C) Tonoplast localization of CmTST1/3-GFP in tobacco protoplast. The laser-scanning confocal microscopy images show fluorescence and merged images. The chlorophyll auto fluorescence (Auto-) in (C) and the bright field images are also presented. CmTST1/3-GFP fusion protein is clearly inserted into the tonoplast, which separates the vacuolar volume from the cytoplasm containing chloroplasts (white arrows). Bars=20  $\mu$ m.

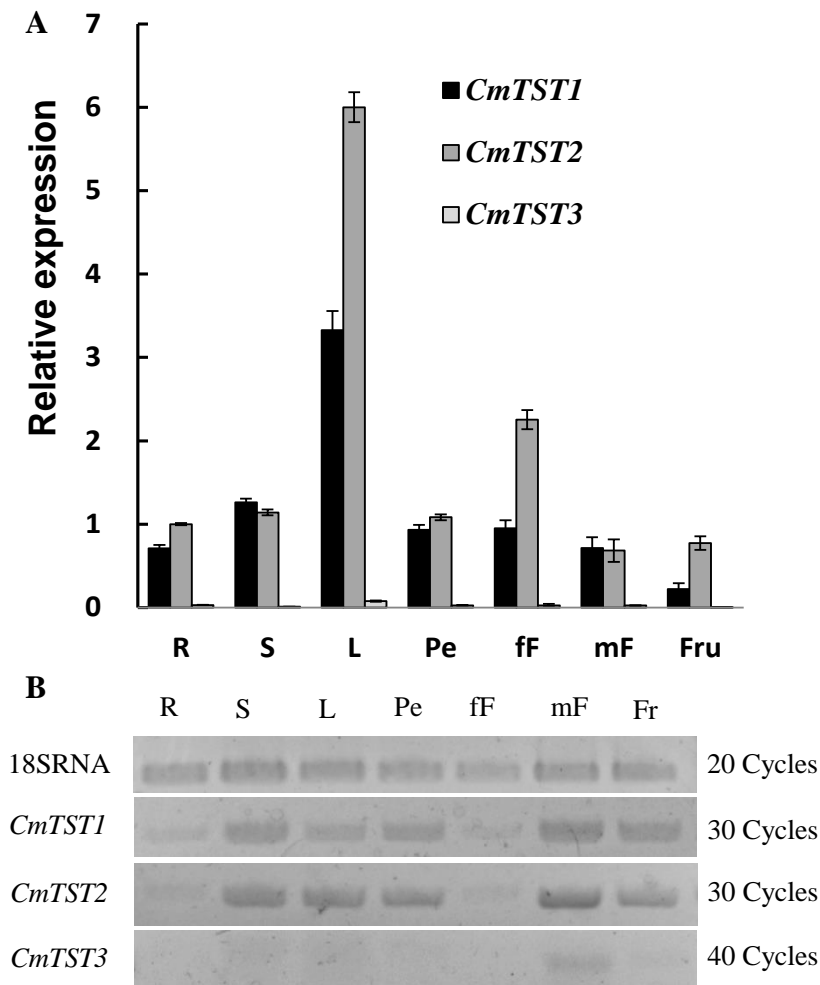

**Supplementary Fig. S5.** Spatial expression analysis of *CmTST* genes in various melon organs by qRT-PCR (A) and RT-PCR (B). R, root; S, stem; L, leaf; Pe, petiole; fF, female flower; mF, male flower; Fr, fruit (20 DAA). Error bars represent the SE for the three technical replicates of the three biological replicates.

**Supplementary Table S1.** Primers used in the paper (Lowercases indicate the restriction enzyme sites or recombination connector sequence).

| <i>primers</i> | <i>Description</i>  | <i>Sequence (5' - 3')</i>                        |
|----------------|---------------------|--------------------------------------------------|
| TST1FLF        | ORF clone           | ATGAAGGGAGCTTTGCTAGTGGC                          |
| TST1FLR        | ORF clone           | TCAATTAATACTACCTTTTCGCAGCT                       |
| TST2FLF        | ORF clone           | ATGAGTGGTTCTGTTTTGGTGGCTG                        |
| TST2FLR        | ORF clone           | TCAACCATTTTTAGCAGCTAAAAGCTGTTTGG                 |
| TST3FLF        | ORF clone           | ATGAGGGGAGCTGTTCTCGTTGCAATCGC                    |
| TST3FLR        | ORF clone           | TTAATCAGCATTATCAGCCTGTTTCGC                      |
| TubulinF       | Quantitative RT-PCR | GCGGTGCTTCTAGACAATGA                             |
| TubulinR       | Quantitative RT-PCR | CCTGAGATACAAGACGGTTGAG                           |
| TST1qF         | Quantitative RT-PCR | ATAATAGGTCCTGCTGAAGA                             |
| TST1qR         | Quantitative RT-PCR | AAAGGGTGACAAGTGGGT                               |
| TST2qF         | Quantitative RT-PCR | GGATGGGATAATGCGACTA                              |
| TST2qR         | Quantitative RT-PCR | GCTCCGATAAGGGATGTG                               |
| TST3qF         | Quantitative RT-PCR | GGTCGTCGTCCTCTAATG                               |
| TST3qR         | Quantitative RT-PCR | ACCAAGGTAACCGCAAGT                               |
| Cm18SF         | Semi RT-PCR         | CGAGTCTGGTAATTGGAATGAGTA                         |
| Cm18SR         | Semi RT-PCR         | CTACGAGCTTTTTAACTGCAACAA                         |
| TST2F          | Semi RT-PCR         | AAGGATGGGATAATGCGACTA                            |
| TST2R          | Semi RT-PCR         | TGACAAGCCAGCGAGGTGA                              |
| TST1F          | Semi RT-PCR         | GCATCAGAGGCTGGTGGAG                              |
| TST1R          | Semi RT-PCR         | TAGCACAGGGATGGTAGCG                              |
| TST3F          | Semi RT-PCR         | GTCAGCCAATCAGCACTCC                              |
| TST3R          | Semi RT-PCR         | AGGCACCAAAGACTCCACC                              |
| TST1GFPF       | Fusion to GFP       | attacgccgaggtcATGAAGGGAGCTTTGCTAGTGGC            |
| TST1GFPR       | Fusion to GFP       | tagggaagaggTCAATTAATACTACCTTTTCGCAGCT            |
| TST2GFPF       | Fusion to GFP       | attacgccgaggtcATGAGTGGTTCTGTTTTGGTGGCTG          |
| TST2GFPR       | Fusion to GFP       | tagggaagaggTCAACCATTTTTAGCAGCTAAAAGCTGTTTGG      |
| TST3GFPF       | Fusion to GFP       | attacgccgaggtcATGAGGGGAGCTGTTCTCGTTGCAATCGC      |
| TST3GFPR       | Fusion to GFP       | tagggaagaggTTAATCAGCATTATCAGCCTGTTTCGC           |
| TST1PF         | Promoter clone      | gaccatgattacccaagcttGTCATATACTTACTTTAGCTCAACCTC  |
| TST1PR         | Promoter clone      | ggactgaccaccgggatccTTATTCAATTCAAGCTCCAATGTGGTCAG |
| TST2PF         | Promoter clone      | gaccatgattacccaagcttCAAAGTCGTTTAGATTTAGTTACCC    |
| TST2PR         | Promoter clone      | ggactgaccaccgggatccTTTGCTTCTTCAAATCGACAGGAAA     |
| TST3PF         | Promoter clone      | gaccatgattacccaagcttCTTATTGTGCATCACAGCATAGAGG    |
| TST3PR         | Promoter clone      | ggactgaccaccgggatccCTTACCAATGGGGTGAATTAGAATATC   |
| TST2-121F      | Clone in to PBI121  | tgetctagaATGAGTGGTTCTGTTTTGGTGGCTG               |
| TST2-121R      | Clone in to PBI121  | tccccggGTCAACCATTTTTAGCAGCTAAAAGCTGTTTGG         |

**Supplementary Table S2.** Potential cis-acting regulatory elements identified in promoter regions of *CmTST* genes.

| Gene name     | Tissue/organ specific relative elements                                                                                                                                                                                                                                                                                                      | Sugar / hormone responsive elements                                                                                                                                                                                                                                                                                           | Abiotic stress-responsive elements                                                                                           |
|---------------|----------------------------------------------------------------------------------------------------------------------------------------------------------------------------------------------------------------------------------------------------------------------------------------------------------------------------------------------|-------------------------------------------------------------------------------------------------------------------------------------------------------------------------------------------------------------------------------------------------------------------------------------------------------------------------------|------------------------------------------------------------------------------------------------------------------------------|
| <i>CmTST1</i> | <b>CAATBOX1</b> (CAAT, tissue-specific),<br><b>ROOTMOTIFTAPOX1</b> (ATATT, organ-specific),<br><b>RAV1AAT</b> (CAACA, high express in rosette leaves and roots),<br><b>OSE1ROOTNODULE</b> (AAAGAT, organ-specific)<br><b>OSE2ROOTNODULE</b> (CTCTT, organ-specific)                                                                          | <b>WBOXHVISO1</b> (TGACT, sugar-responsive),<br><b>SREATMSD</b> (TTATCC, sugar-responsive),<br><b>PYRIMIDINEBOXOSRAMY1A</b> (CCTTTT, gibberellin-responsive),<br><b>P-box</b> (CCTTTTG, gibberellin-responsive)<br><b>ARFAT</b> (ACTTTA, auxin-responsive),<br><b>ERE</b> (ATTTCAA, ethylene-responsive)                      | <b>ELRECOREPCR1</b> (TTGACC, pathogen- and wound-induced),<br><b>TC-rich</b> (ATTTTCTTCA, defense and stress responsiveness) |
| <i>CmTST2</i> | <b>CAATBOX1</b> (CAAT, tissue-specific),<br><b>ROOTMOTIFTAPOX1</b> (ATATT, organ-specific),<br><b>RAV1AAT</b> (CAACA, high express in rosette leaves and roots),<br><b>RAV1BAT</b> (CACCTG, high express in rosette leaves and roots),<br><b>OSE2ROOTNODULE</b> (CTCTT, organ-specific),<br><b>RHERPATEXPA7</b> (KCACGW, root hair-specific) | <b>WBOXHVISO1</b> (TGACT, sugar-responsive),<br><b>PYRIMIDINEBOXOSRAMY1A</b> (CCTTTT, gibberellin-responsive),<br><b>GARE</b> (AAACAGA, gibberellin-responsive)<br><b>ARFAT</b> (ACTTTA, auxin-responsive),<br><b>DPBFCOREDCDC3</b> (ACACNNG, ABA-responsive),<br><b>TCA-element</b> (CAGAAAAGGA, salicylic acid-responsive), | <b>TC-rich</b> (ATTTTCTTCA, defense and stress responsiveness)                                                               |
| <i>CmTST3</i> | <b>POLLENILELAT52</b> (AGAAA, pollen-specific motif)<br><b>CAATBOX1</b> (CAAT, tissue-specific),<br><b>ROOTMOTIFTAPOX1</b> (ATATT, organ-specific)                                                                                                                                                                                           | <b>SREATMSD</b> (TTATCC, sugar-responsive),<br><b>PYRIMIDINEBOXOSRAMY1A</b> (CCTTTT, gibberellin-responsive),<br><b>GARE</b> (AAACAGA, gibberellin-responsive)<br><b>ERE</b> (ATTTCAA, ethylene-responsive),                                                                                                                  | <b>TC-rich</b> (ATTTTCTTCA, defense and stress responsiveness)                                                               |
